# Supplementary material for: Hydrogen bond-free flavin redox properties: managing flavins in extreme aprotic solvents
Source: Royal Society of Chemistry journal article supplement (doi:10.1039/b801952e), 2008-01-01
Supplement: b801952e.pdf [file b801952e.pdf]

### Supplemental Information

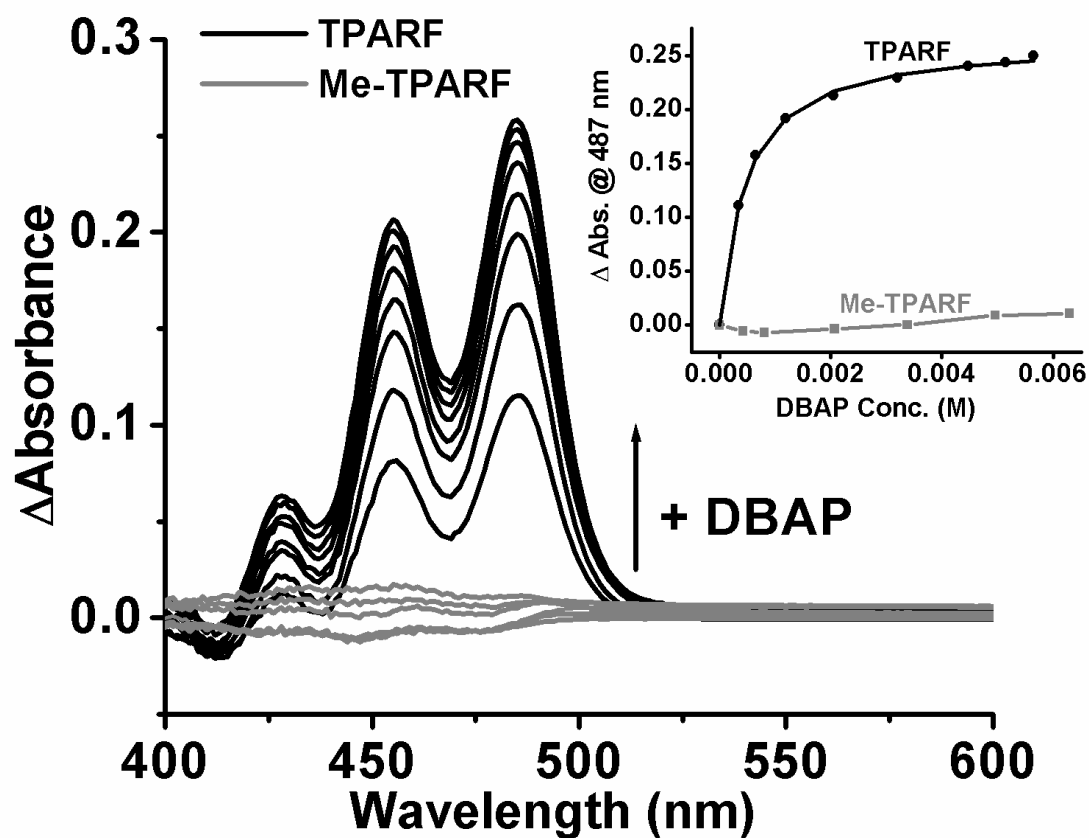

Optical Absorption Spectra of the addition of DBAP to TPARF and Me-TPARF. The plot of the change in the absorption at 487 nm versus added DBAP is shown in the inset for both TPARF and Me-TPARF.

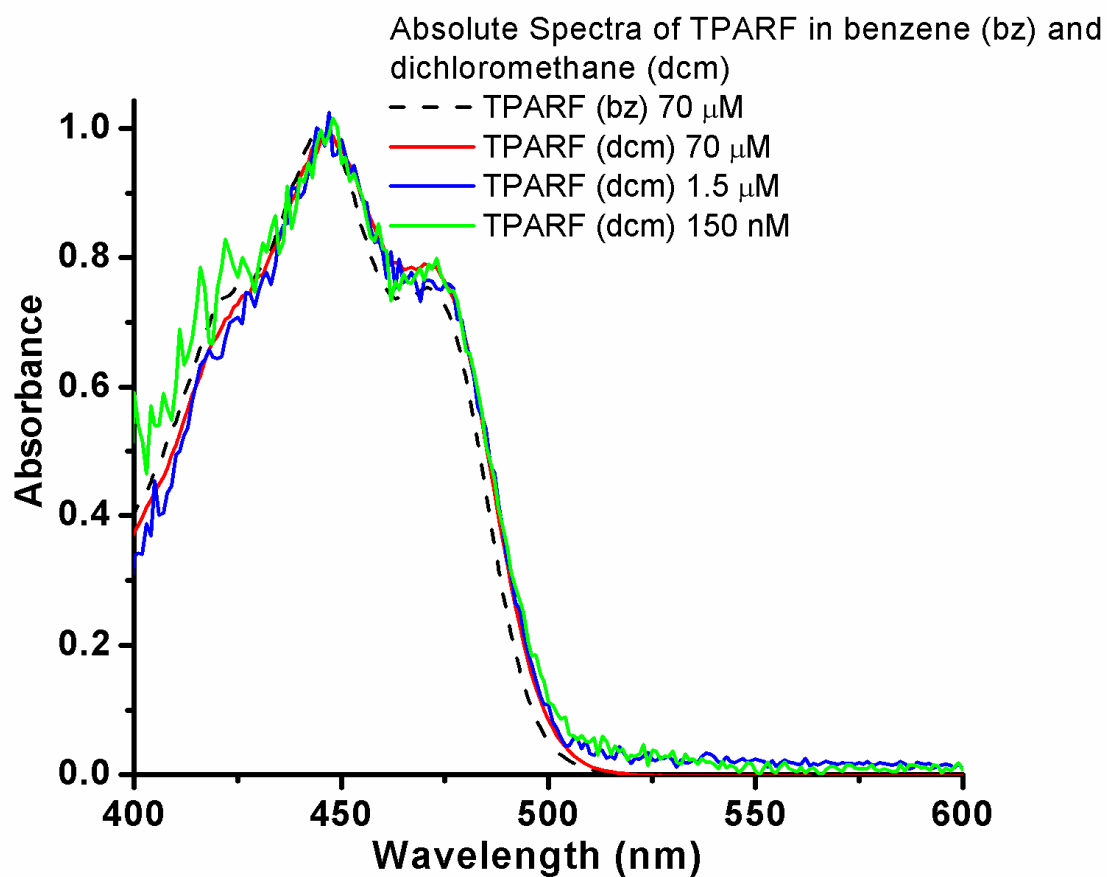

Optical Absorption Spectra of TPARF in benzene and in dichloromethane. TPARF. The figure shows no net effect in the spectra in dichloromethane because of the dilution of TPARF, indicating the absence of TAPRF-TPARF interactions.

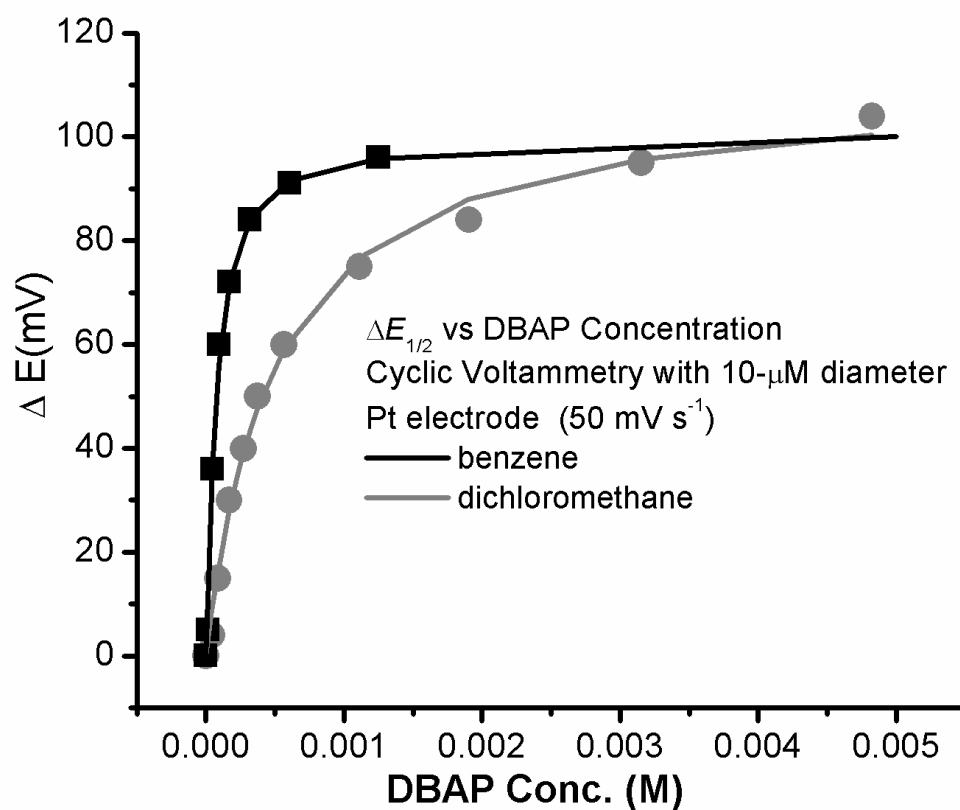

Plot of the change in reduction potential of TAPRF,  $\Delta E_{1/2}$ , versus added DBAP in both benzene and dichloromethane (with 0.5 M  $\text{Hx}_4\text{NClO}_4$  in both solvents). The overall change is 100 mV in both solvents.

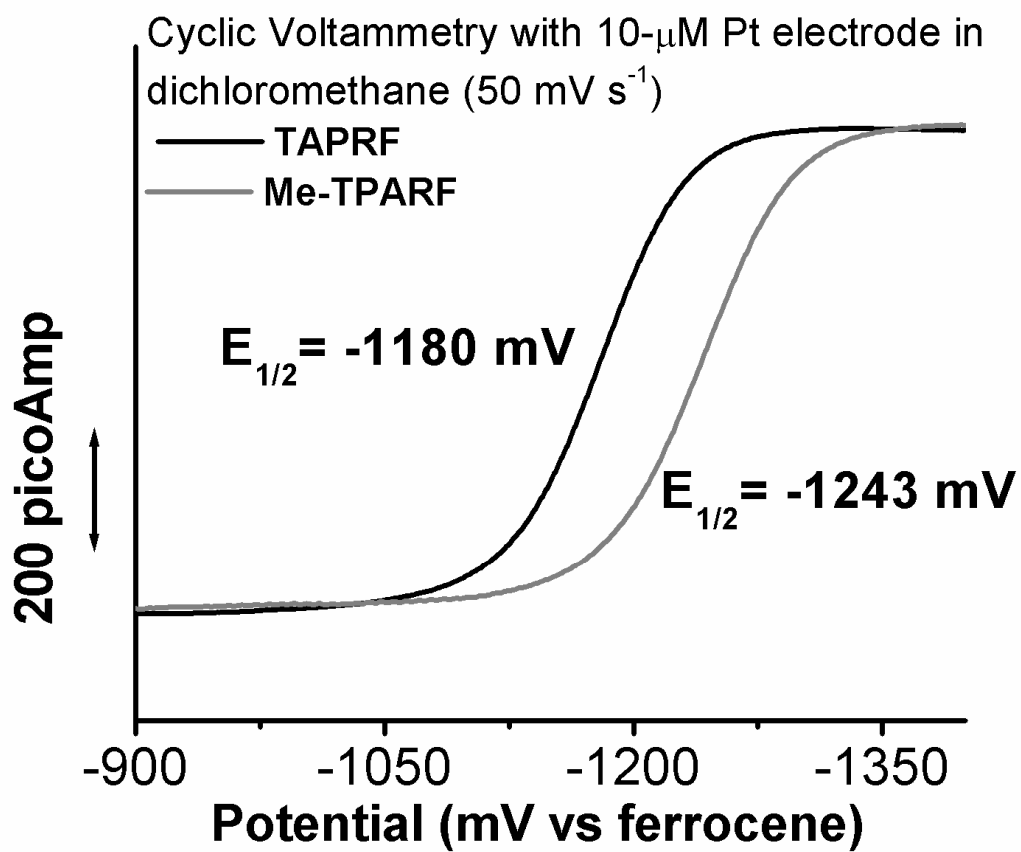

Low current voltammograms of TAPRF and Me-TPARF in dichloromethane.

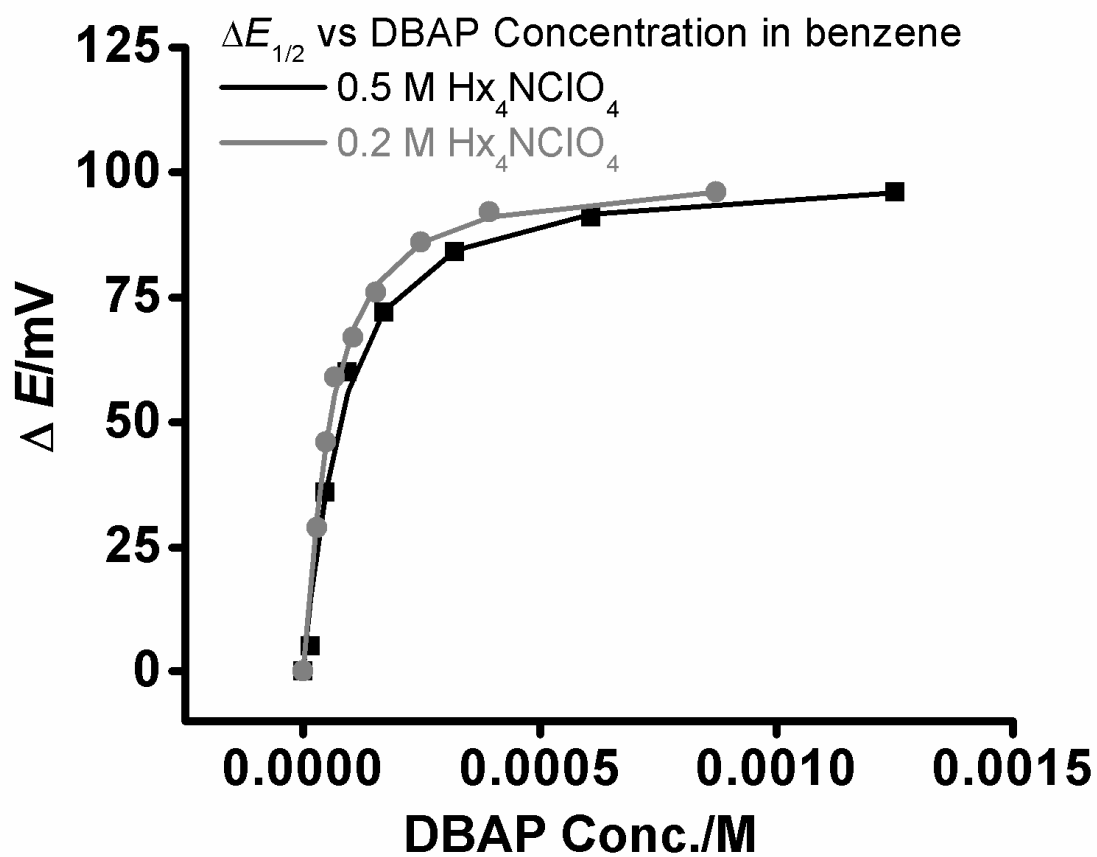

Plot of the change in reduction potential of TAPRF,  $\Delta E_{1/2}$ , versus added DBAP in both benzene with 0.2 M and 0.5 M tetrahexylammonium perchlorate (Hx<sub>4</sub>NClO<sub>4</sub>).
